# Supplementary material for: JianPiYiShen formula prevents cisplatin-induced acute kidney injury in mice by improving necroptosis through MAPK pathway
Source: Springer Nature journal article supplement (doi:10.1186/s12906-024-04366-9), 2024-02-24

### H&E staining

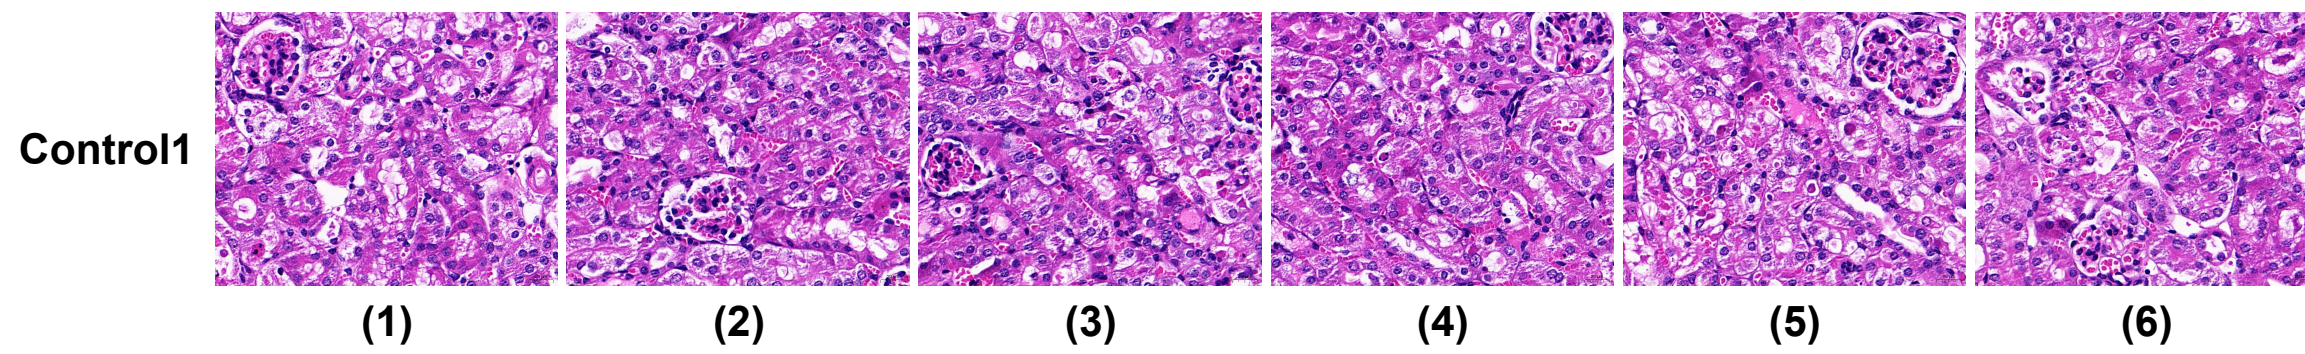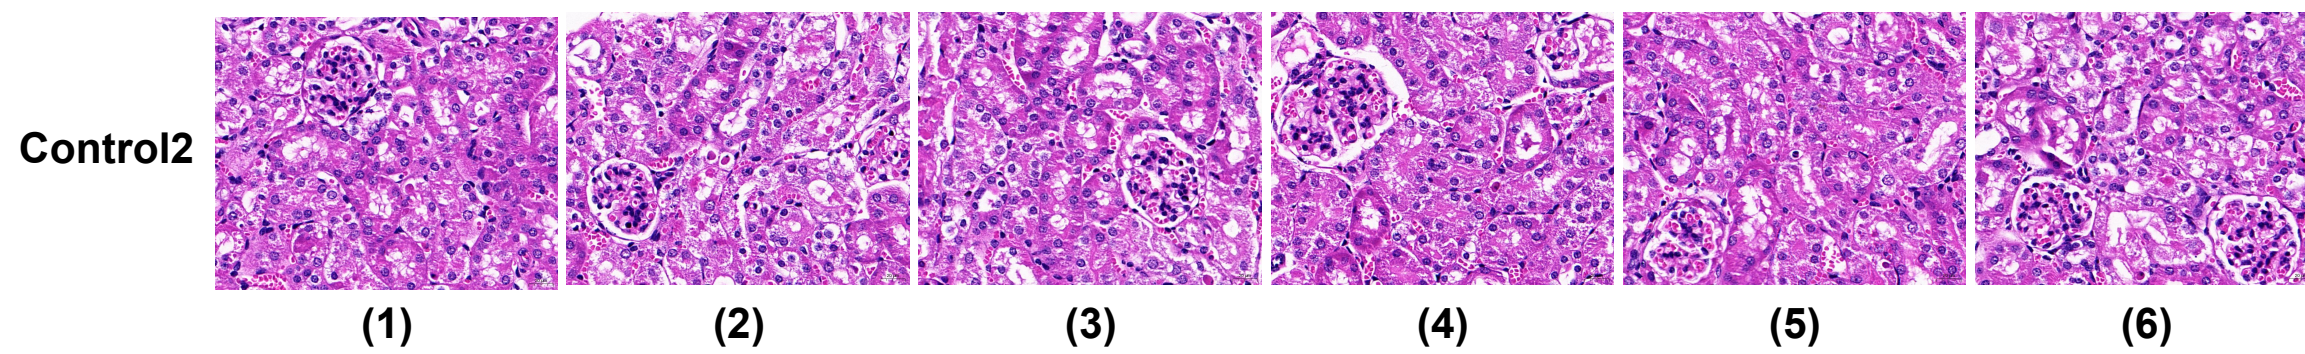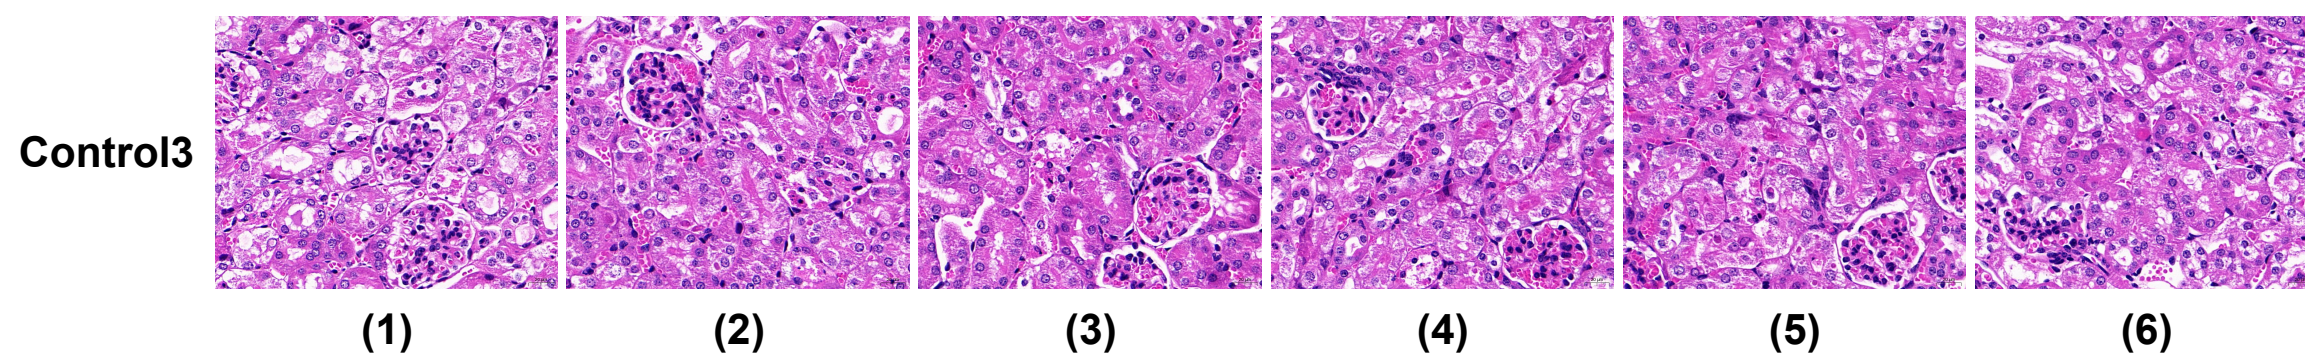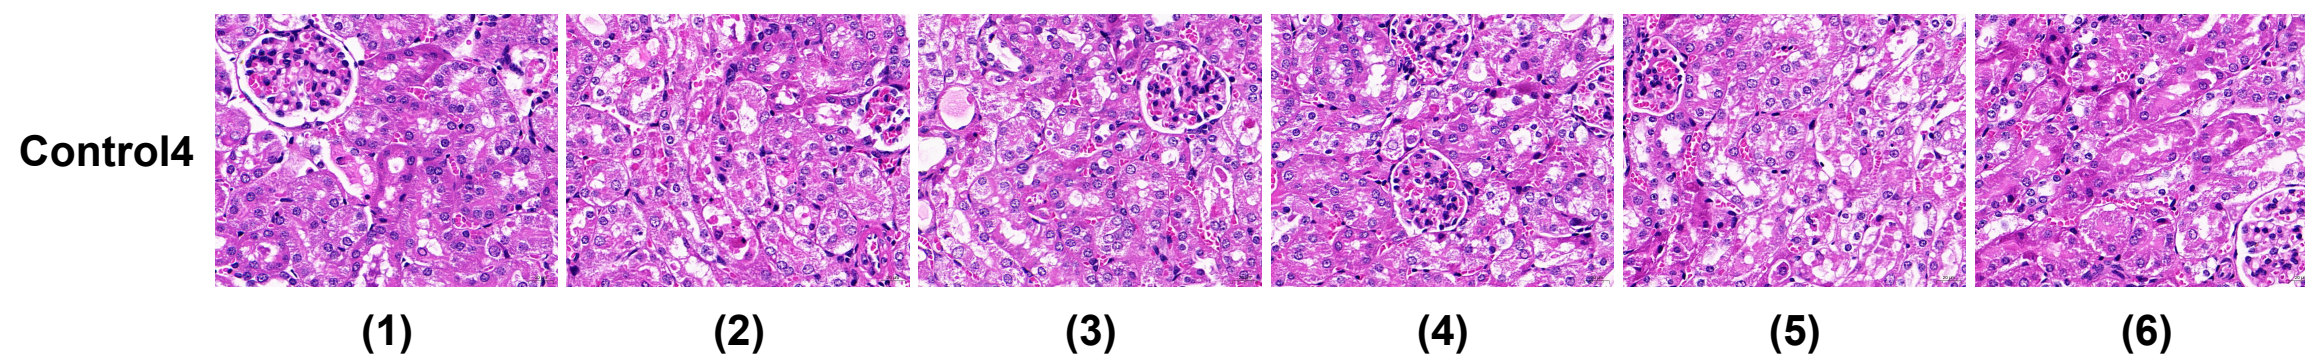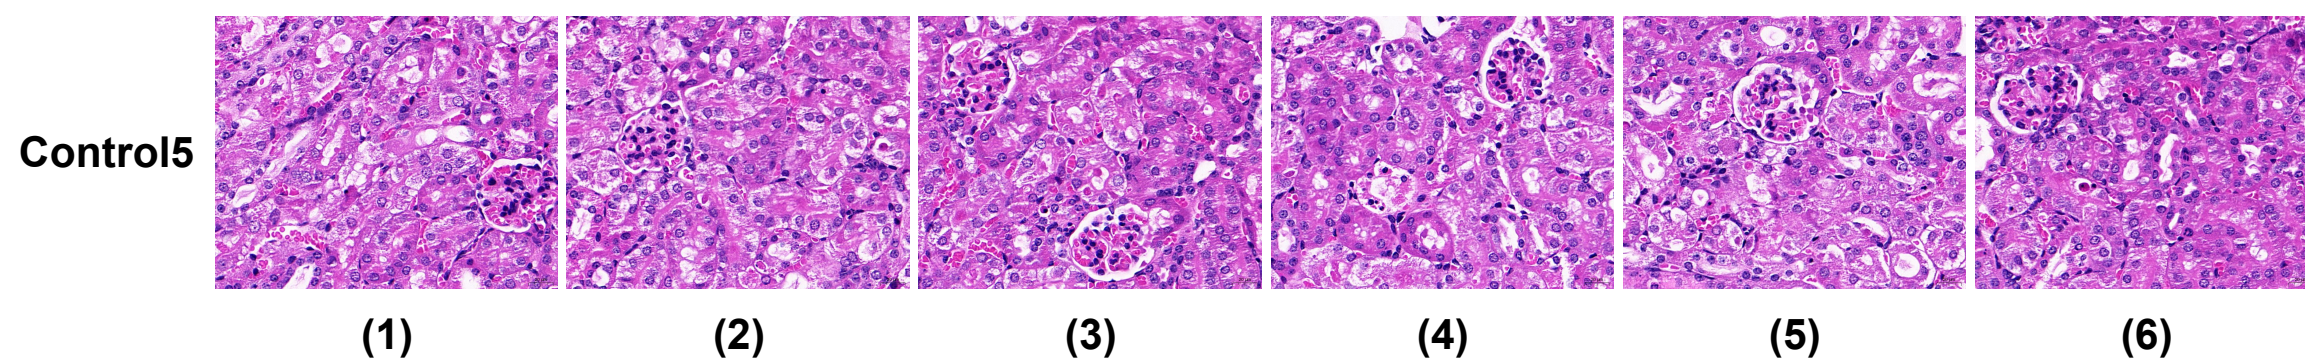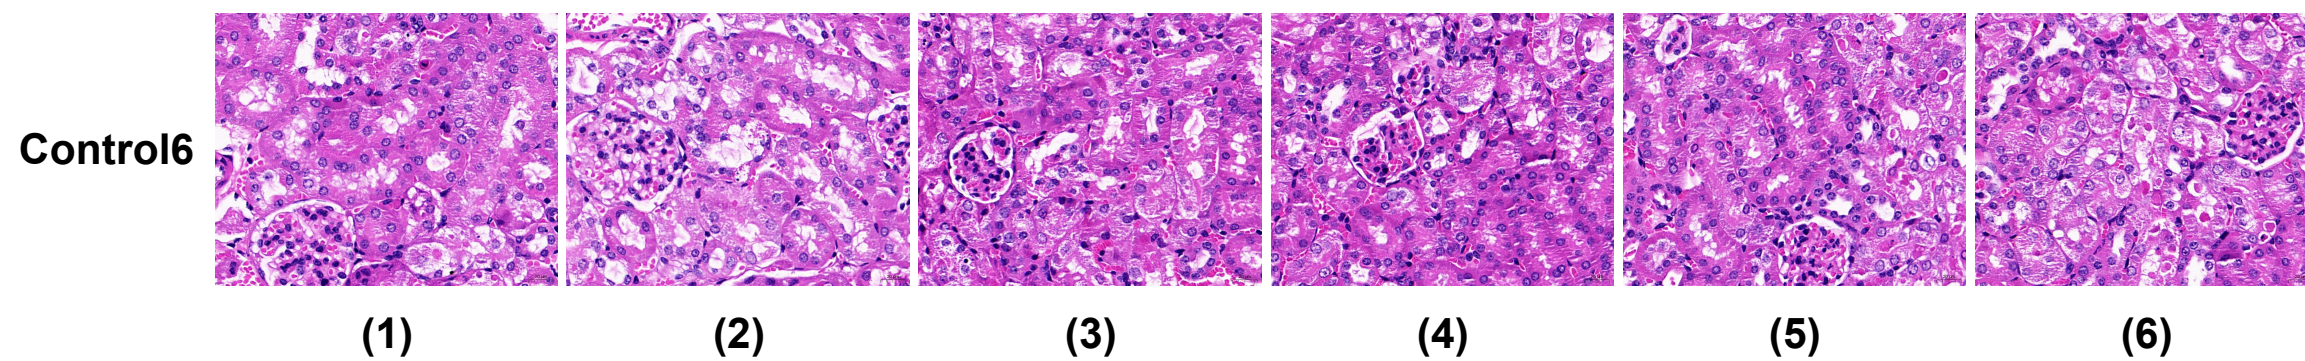

H&E staining

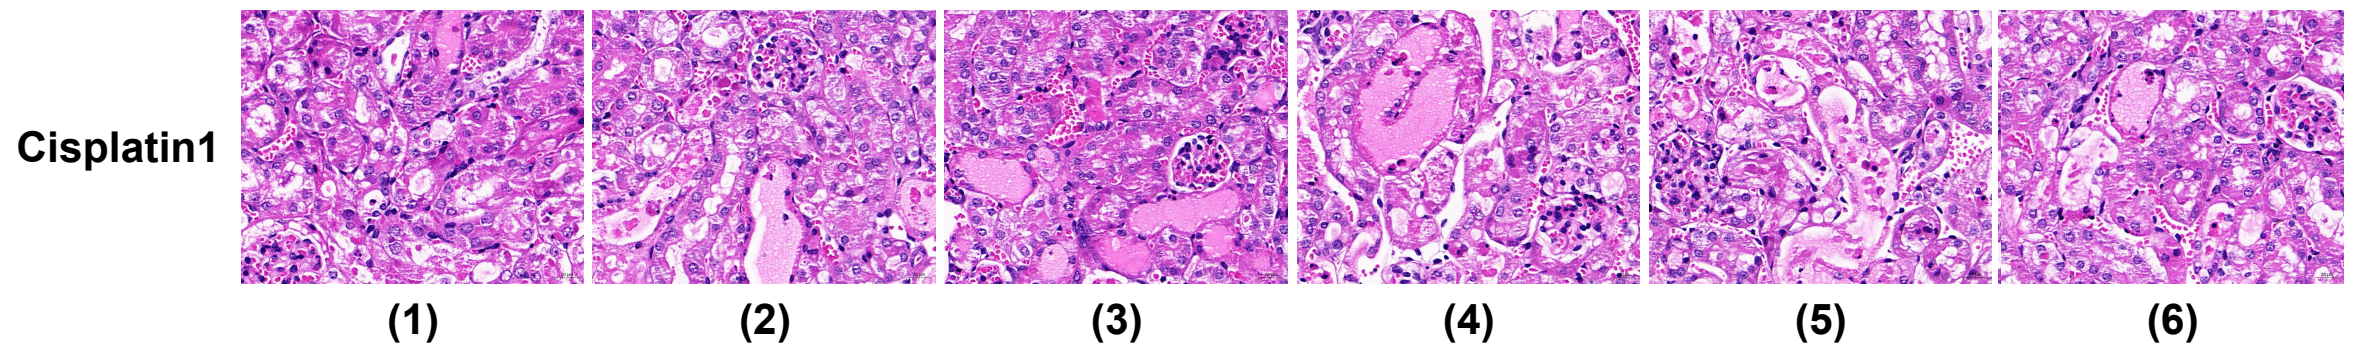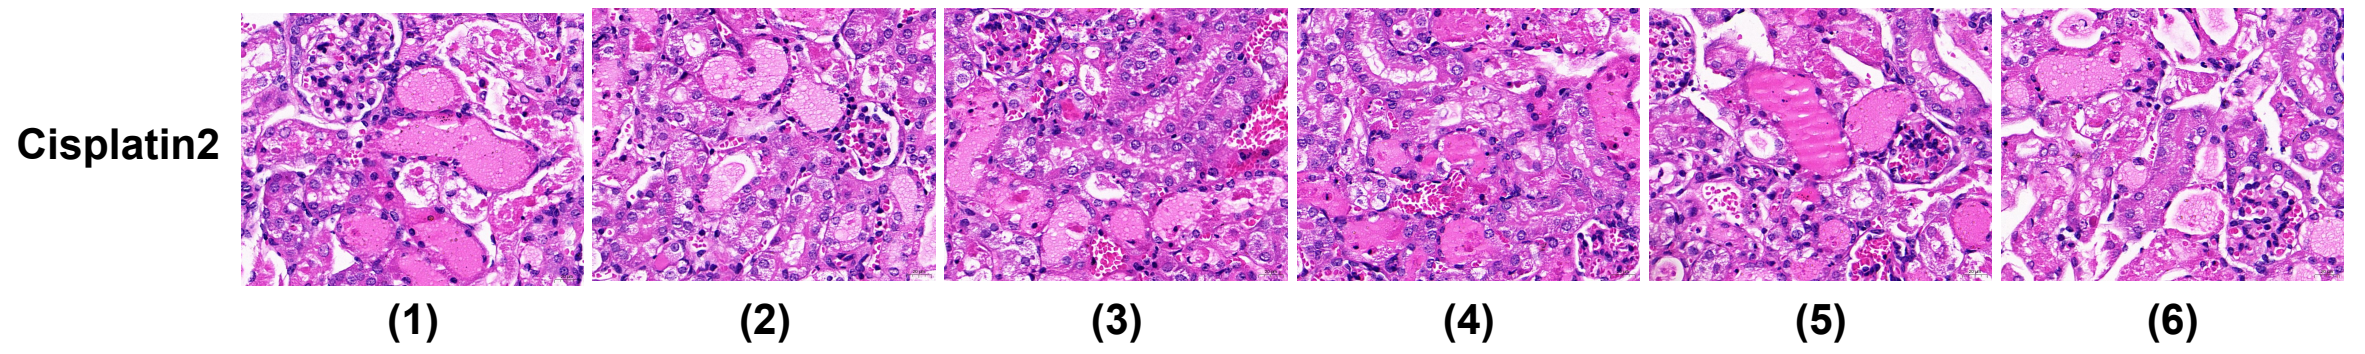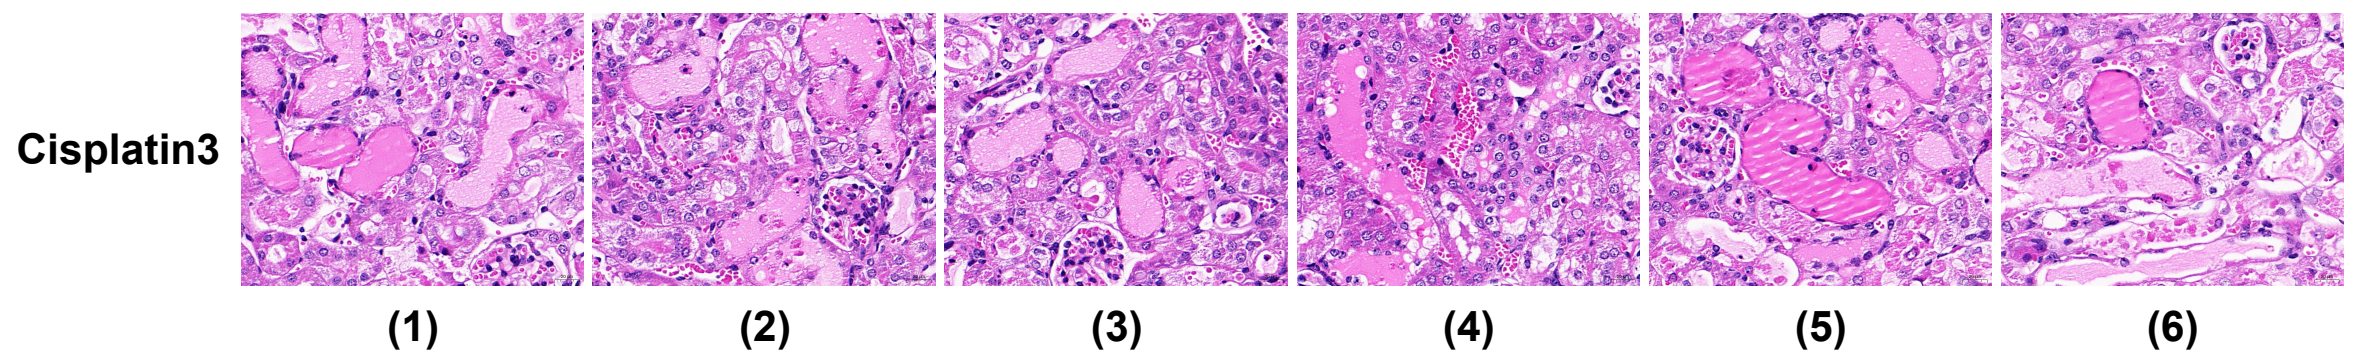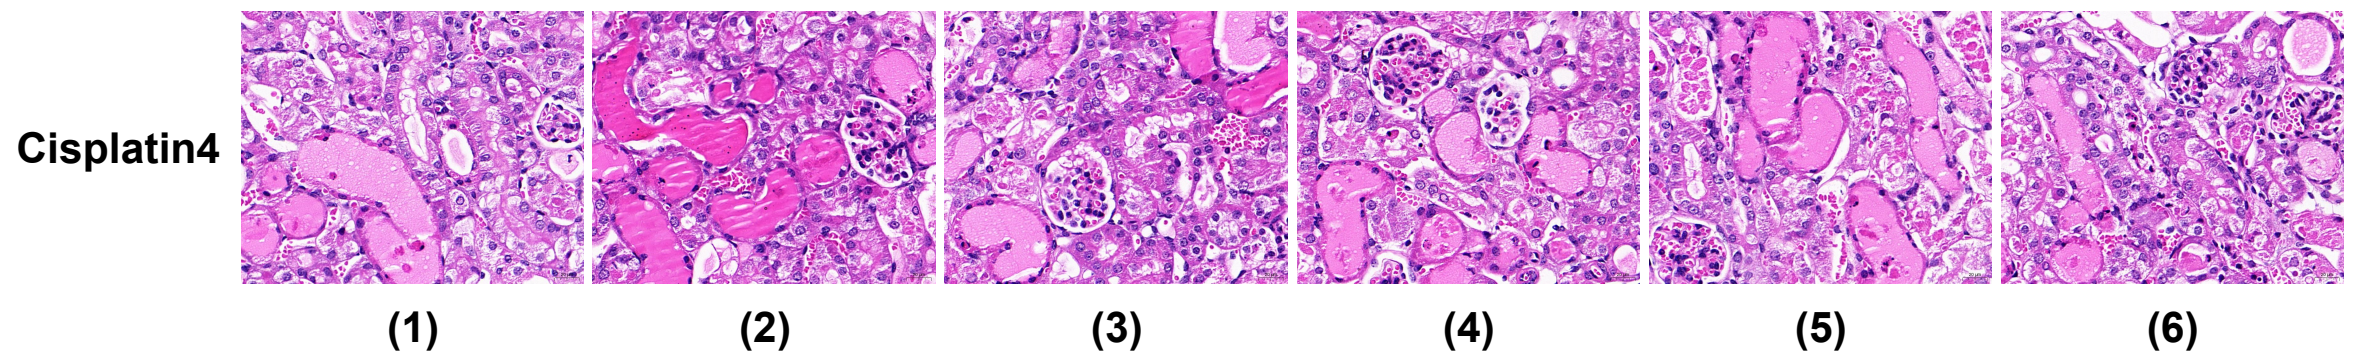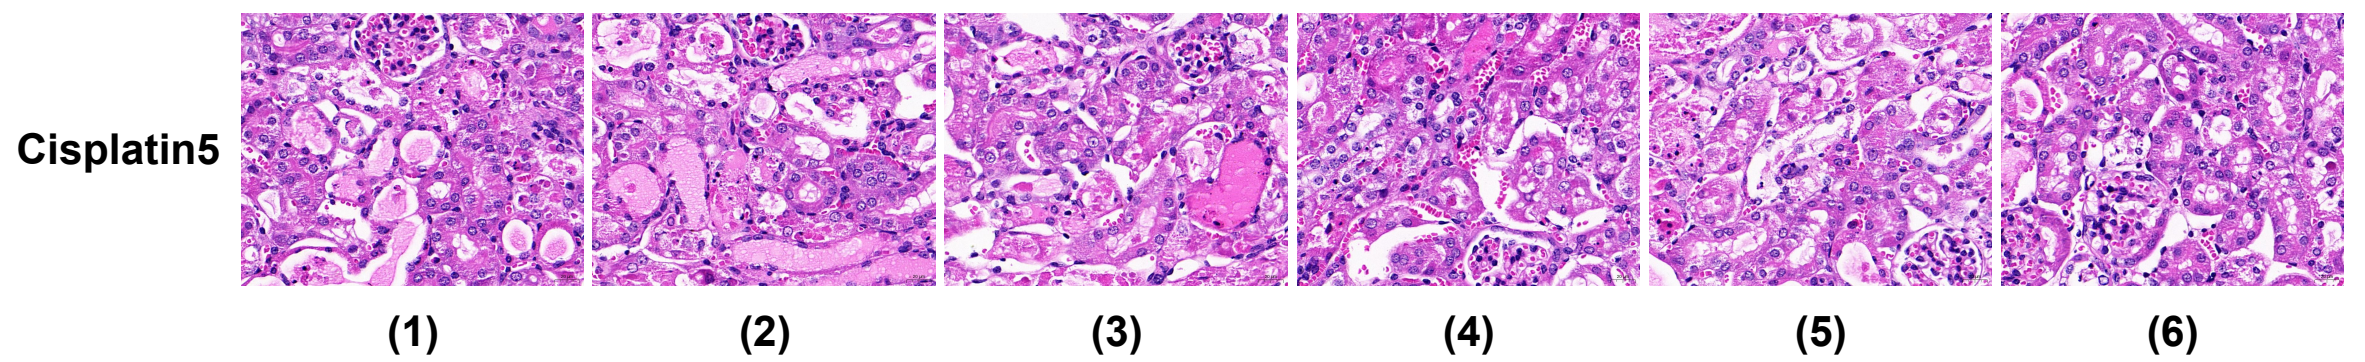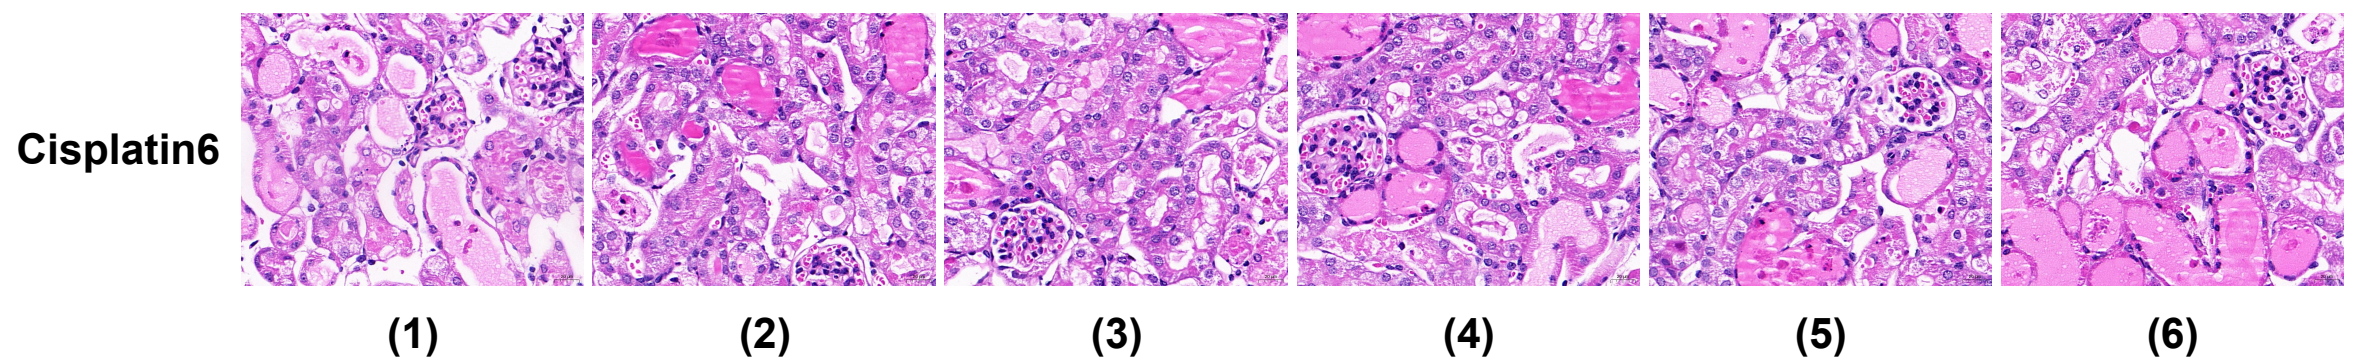

**H&E staining**

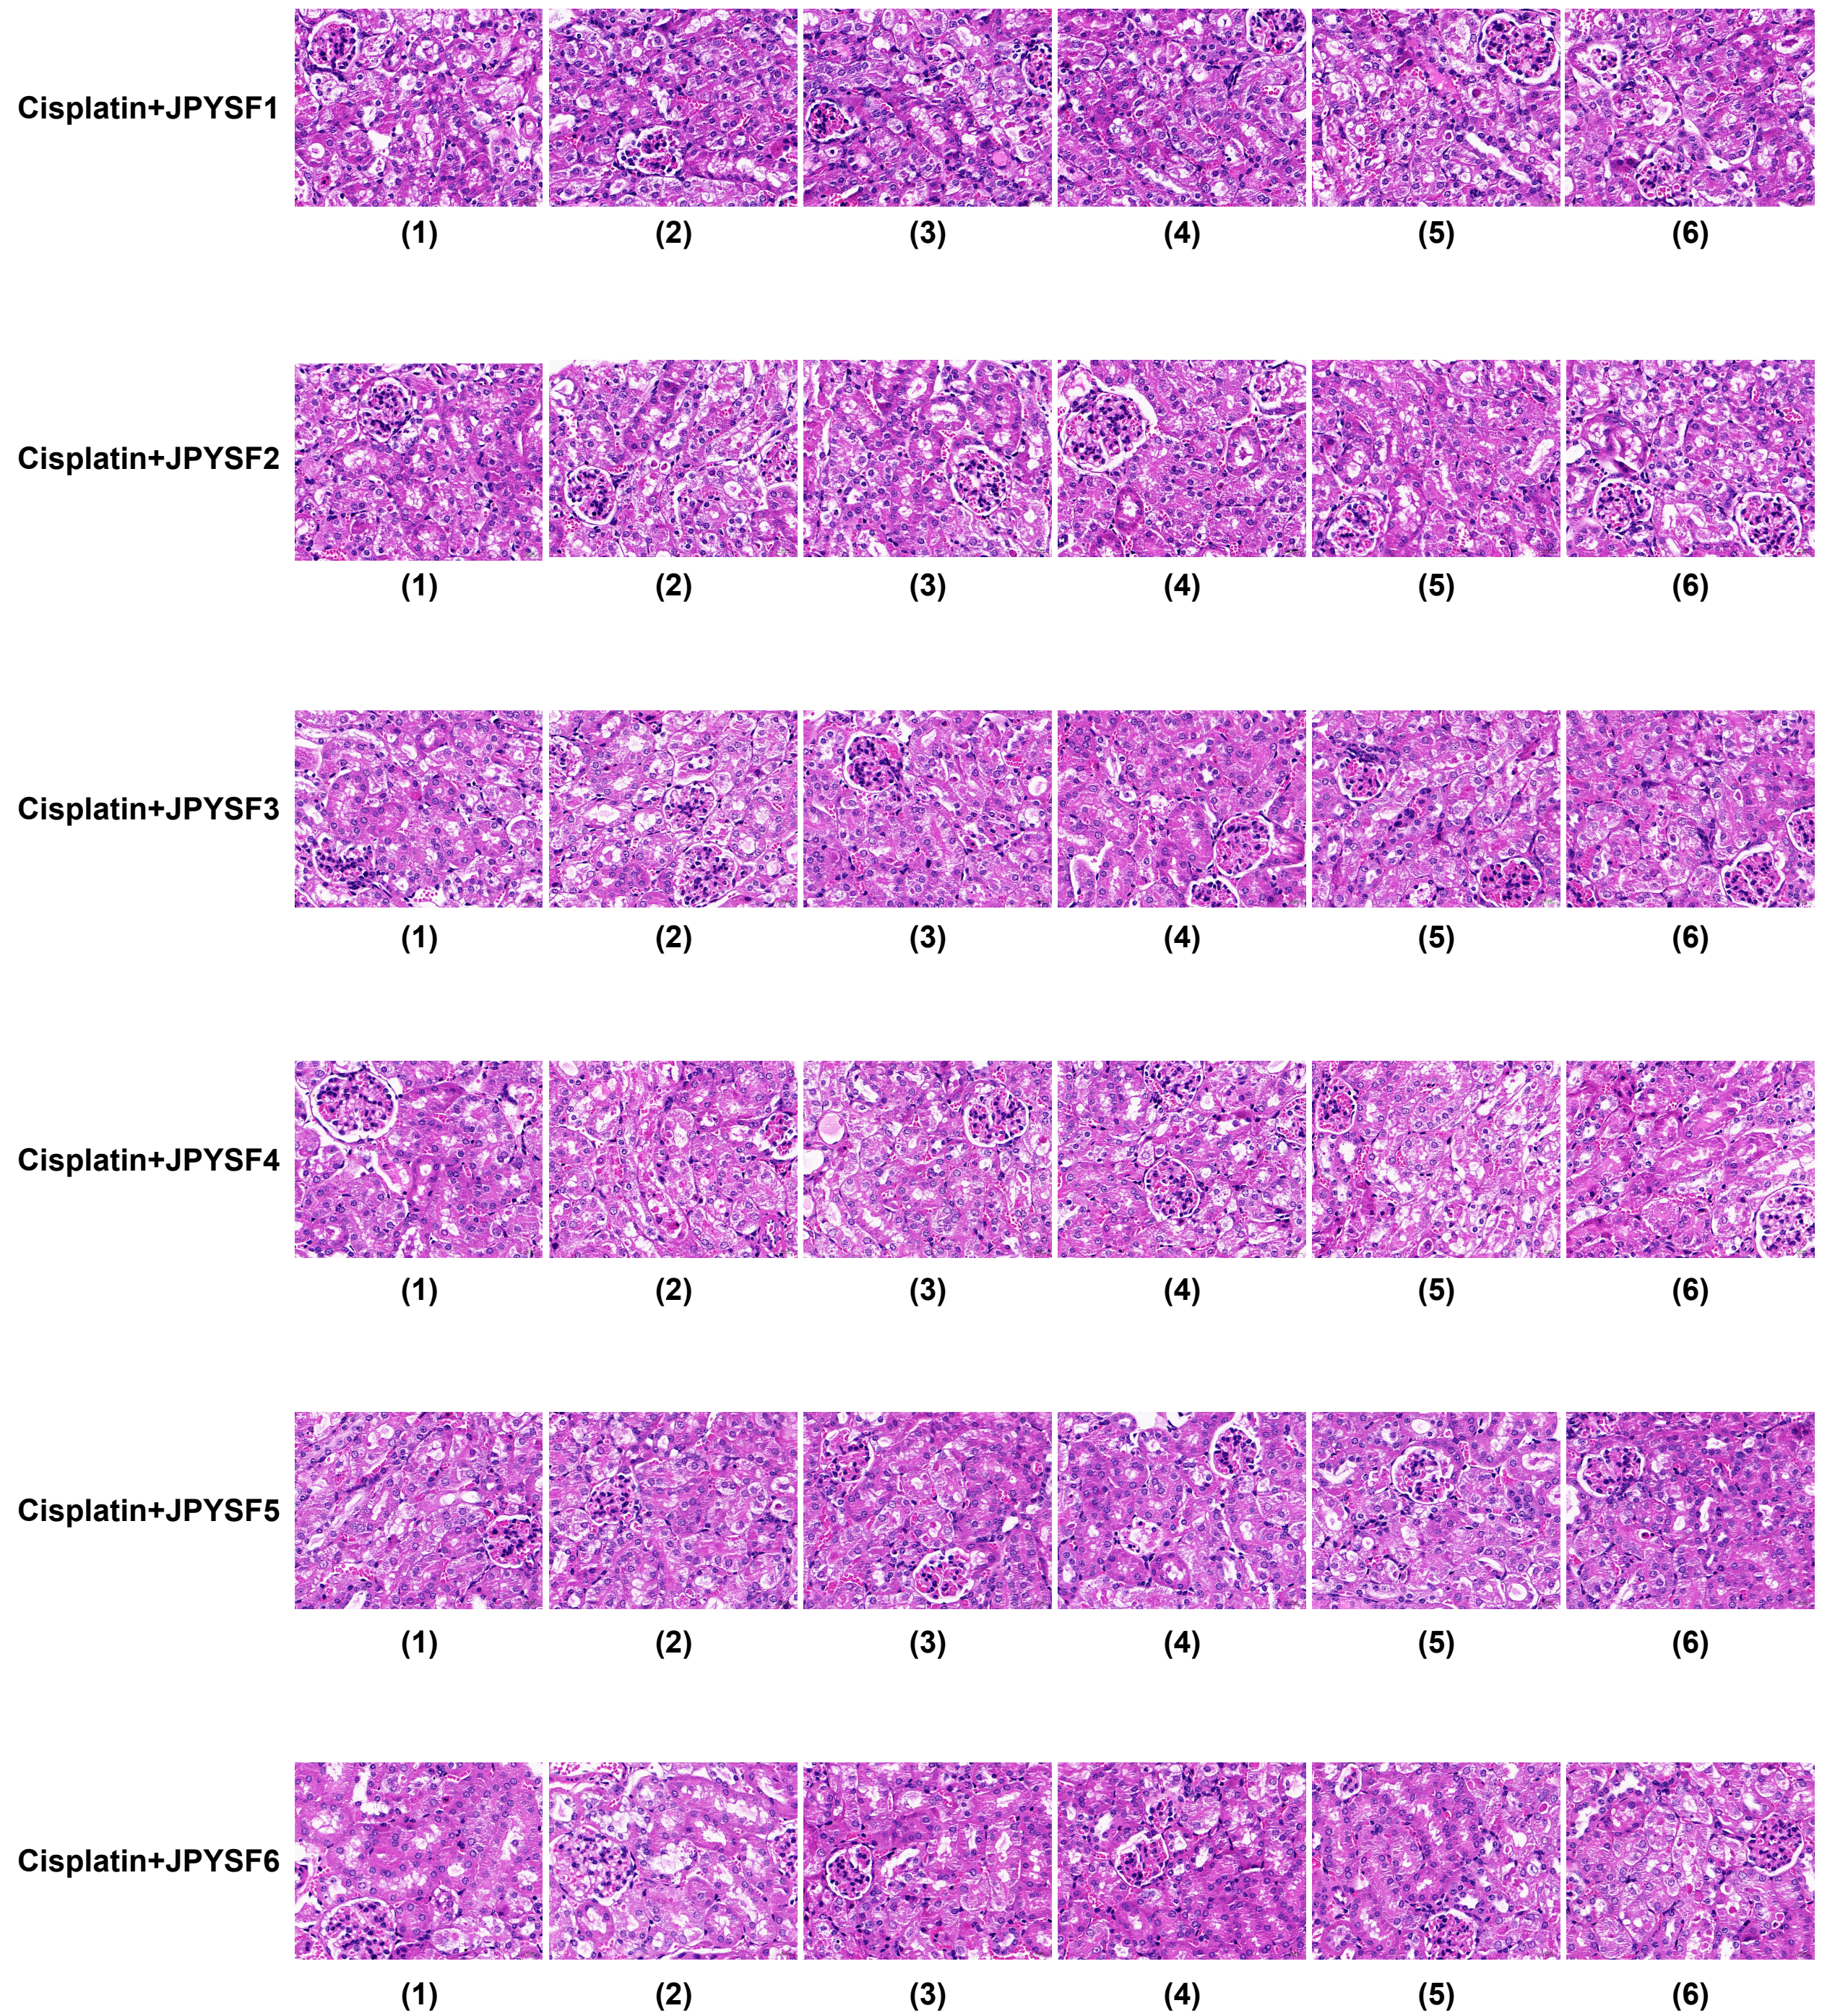

Supplement: MOESM1 [file 26777314]
