# Supplementary material for: JianPiYiShen formula prevents cisplatin-induced acute kidney injury in mice by improving necroptosis through MAPK pathway
Source: Springer Nature journal article supplement (doi:10.1186/s12906-024-04366-9), 2024-02-24
Supplement: MOESM3 [file 26777314]

## Western blotting

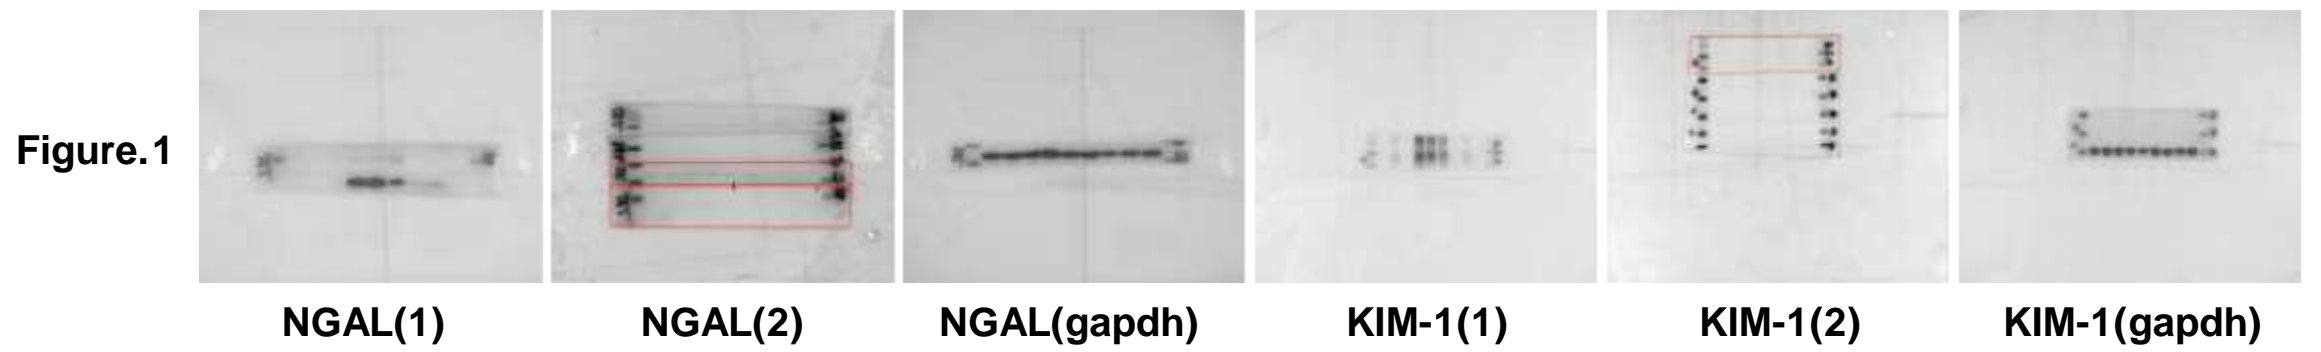

The above images are raw data of WB results in Figure 1, and the image marked in red box corresponds to the WB bands in Figure 1.

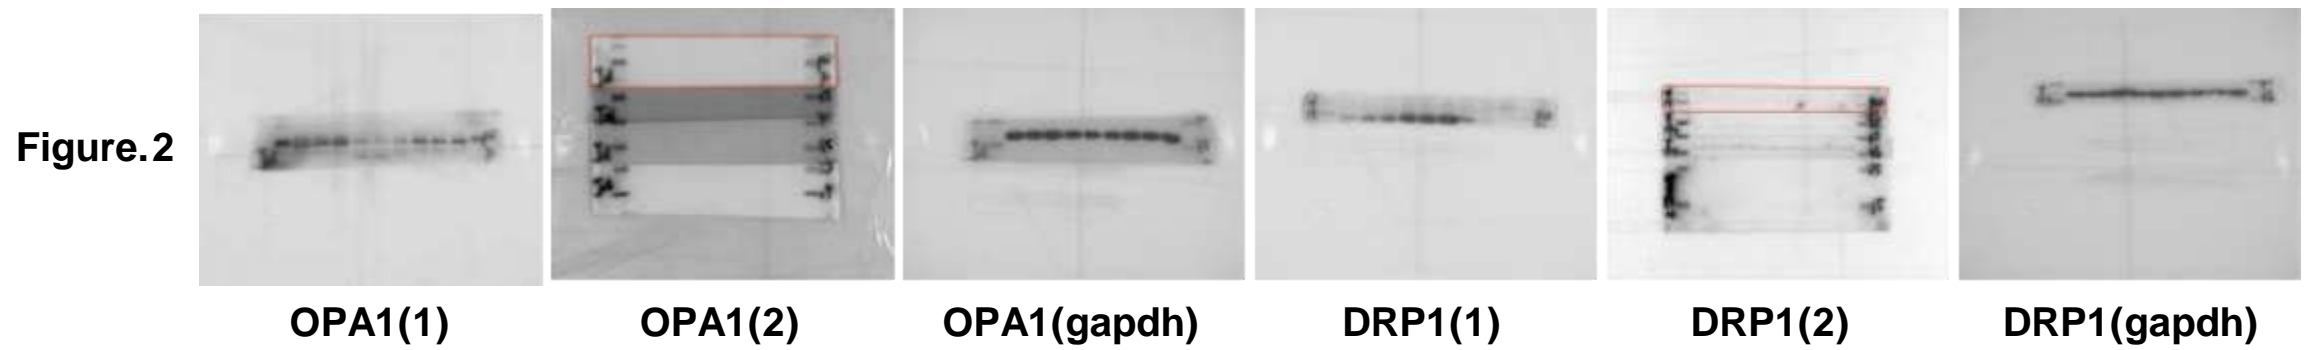

The above images are raw data of WB results in Figure 2, and the image marked in red box corresponds to the WB bands in Figure 2.

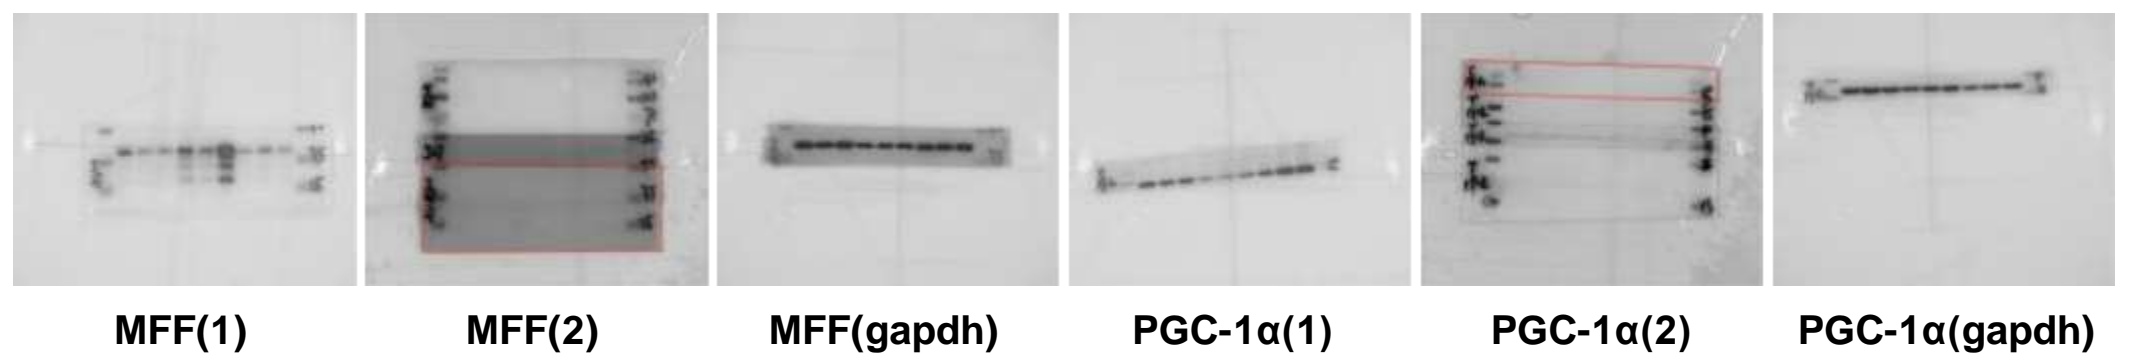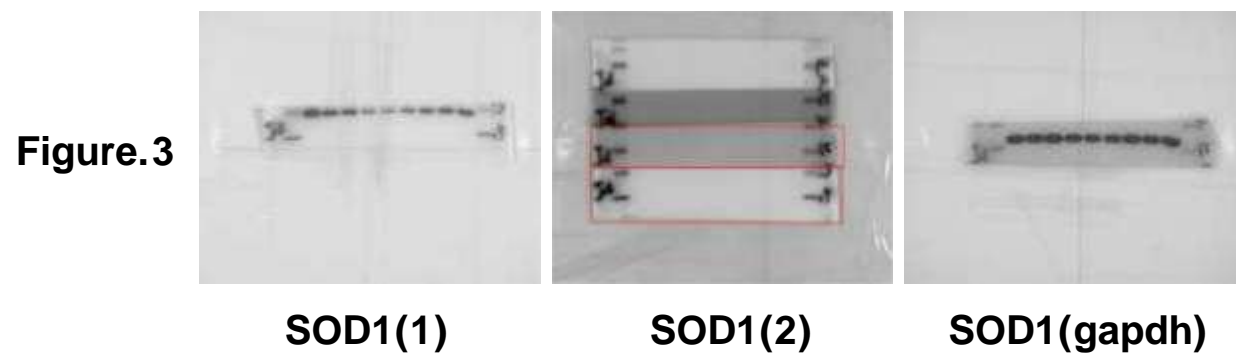

The above images are raw data of WB results in Figure 3, and the image marked in red box corresponds to the WB bands in Figure 3.

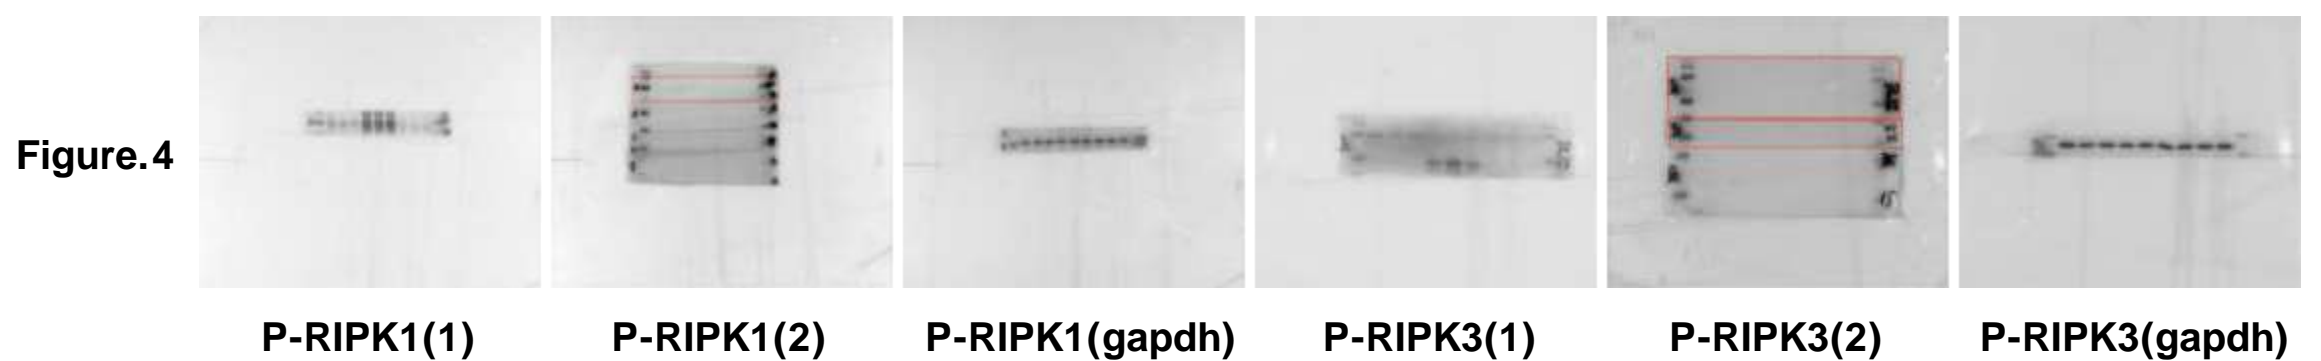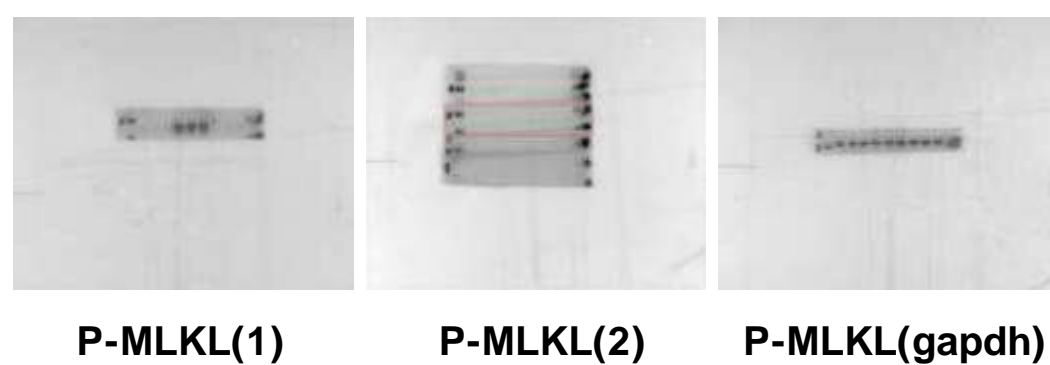

The above images are raw data of WB results in Figure 4, and the image marked in red box corresponds to the WB bands in Figure 4.

## Western blotting

Figure.5

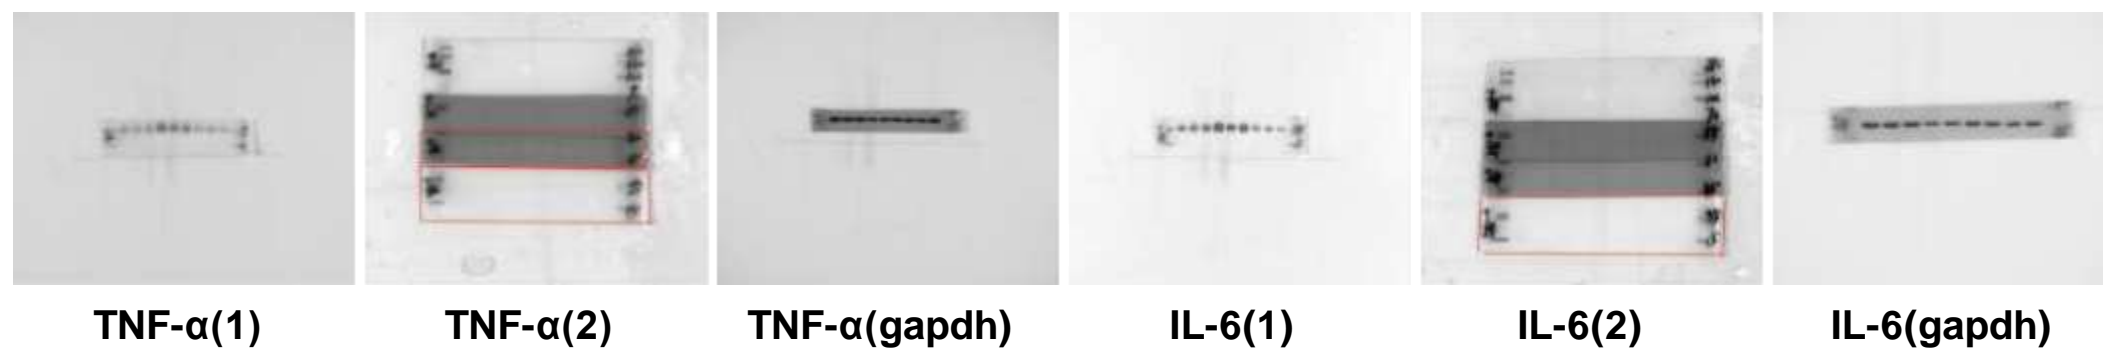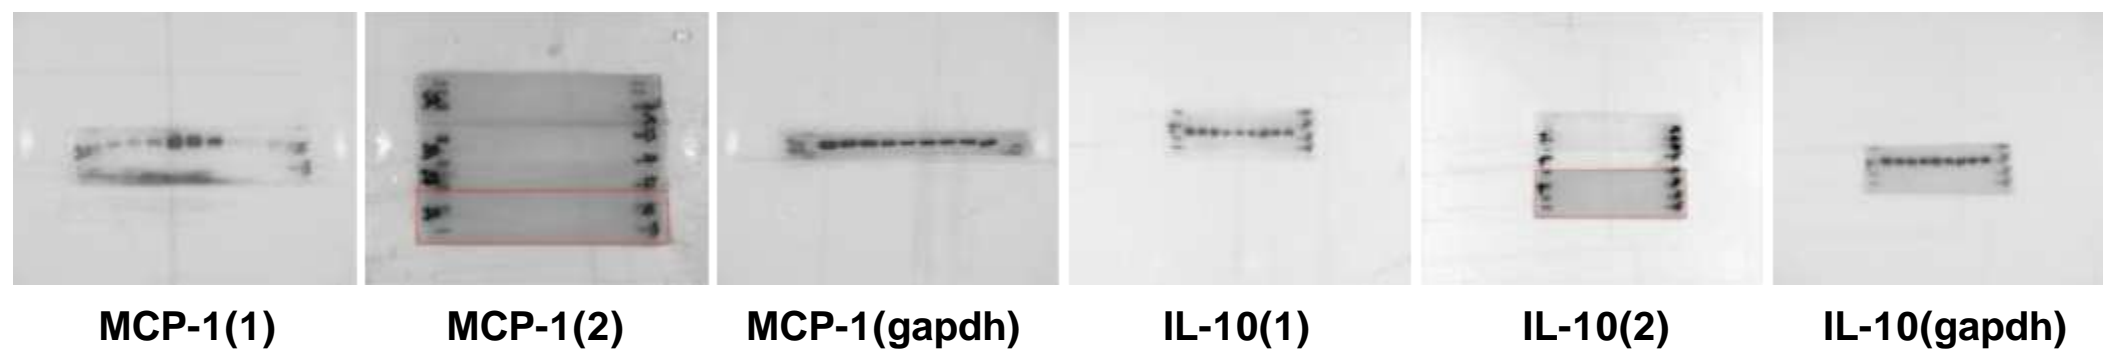

The above images are raw data of WB results in Figure 5, and the image marked in red box corresponds to the WB bands in Figure 5.

Figure.6

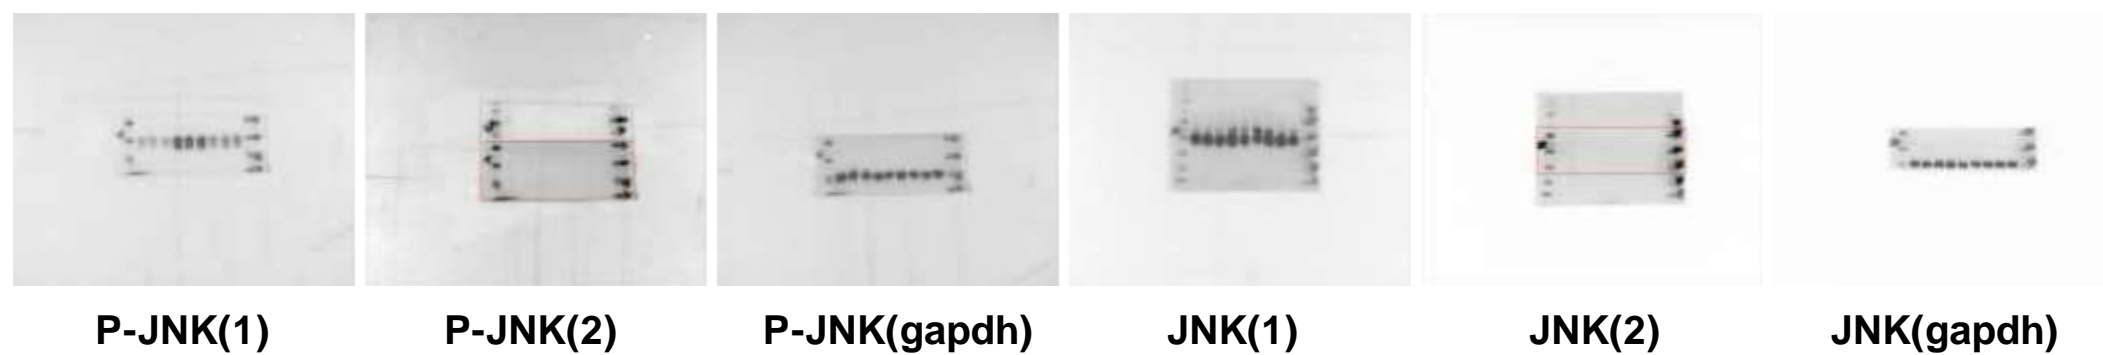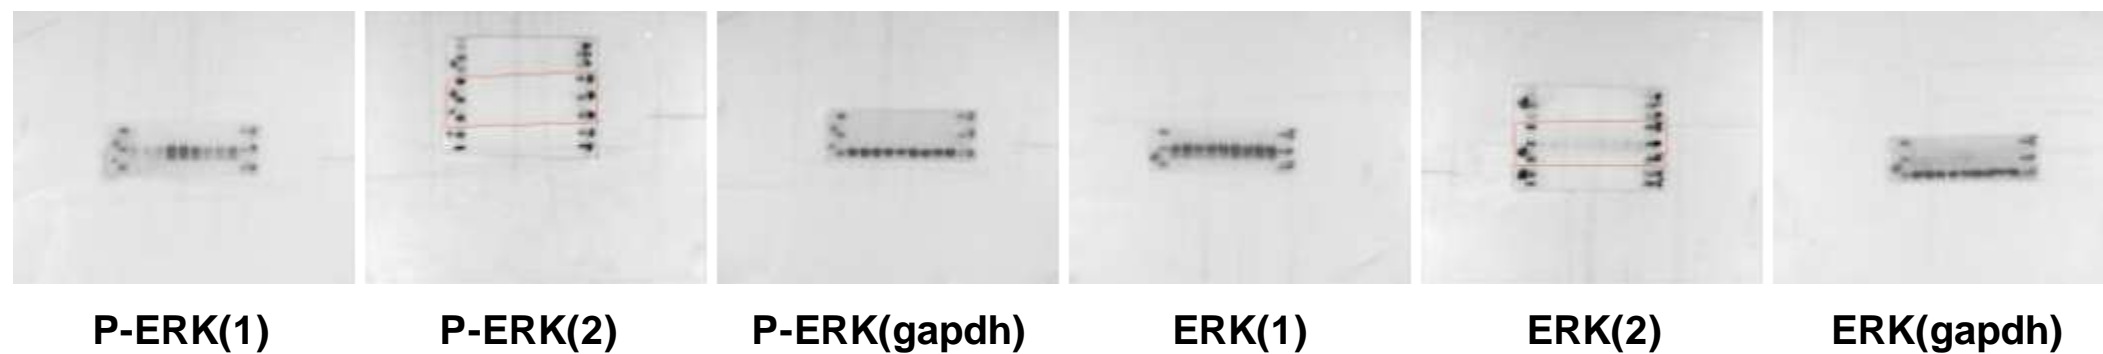

The above images are raw data of WB results in Figure 6, and the image marked in red box corresponds to the WB bands in Figure 6.
