# Supplementary material for: JianPiYiShen formula prevents cisplatin-induced acute kidney injury in mice by improving necroptosis through MAPK pathway
Source: BMC Complement Med Ther. 2024 Feb 24;24:101. doi: 10.1186/s12906-024-04366-9 (PMC10893720; doi:10.1186/s12906-024-04366-9)
Supplement: Supplementary file 2 — Supplementary Material 2: The specific score for each slice in H&E Staining [file 12906_2024_4366_MOESM2_ESM.xlsx]

## Sheet: Sheet1
The specific scroes of each slices in H&E staining
Group	Scroe	AVERAGE		Group	Scroe	AVERAGE		Group	Scroe	AVERAGE
Control1-1	0	0.166667		Cisplatin1-1	3	3.66667		Cisplatin+JPYSF1-1	2	2
Control1-2	0			Cisplatin1-2	4			Cisplatin+JPYSF1-2	2
Control1-3	1			Cisplatin1-3	4			Cisplatin+JPYSF1-3	1
Control1-4	0			Cisplatin1-4	3			Cisplatin+JPYSF1-4	3
Control1-5	0			Cisplatin1-5	4			Cisplatin+JPYSF1-5	2
Control1-6	0			Cisplatin1-6	4			Cisplatin+JPYSF1-6	2
Control2-1	0	0.333333		Cisplatin2-1	3	3.16667		Cisplatin+JPYSF2-1	3	2
Control2-2	1			Cisplatin2-2	4			Cisplatin+JPYSF2-2	2
Control2-3	0			Cisplatin2-3	3			Cisplatin+JPYSF2-3	2
Control2-4	0			Cisplatin2-4	4			Cisplatin+JPYSF2-4	1
Control2-5	1			Cisplatin2-5	2			Cisplatin+JPYSF2-5	2
Control2-6	0			Cisplatin2-6	3			Cisplatin+JPYSF2-6	2
Control3-1	0	0.166667		Cisplatin3-1	4	3.66667		Cisplatin+JPYSF3-1	2	1.66667
Control3-2	0			Cisplatin3-2	4			Cisplatin+JPYSF3-2	1
Control3-3	0			Cisplatin3-3	4			Cisplatin+JPYSF3-3	2
Control3-4	1			Cisplatin3-4	3			Cisplatin+JPYSF3-4	1
Control3-5	0			Cisplatin3-5	4			Cisplatin+JPYSF3-5	2
Control3-6	0			Cisplatin3-6	3			Cisplatin+JPYSF3-6	2
Control4-1	0	0.166667		Cisplatin4-1	4	3.83333		Cisplatin+JPYSF4-1	3	2
Control4-2	1			Cisplatin4-2	4			Cisplatin+JPYSF4-2	2
Control4-3	0			Cisplatin4-3	4			Cisplatin+JPYSF4-3	2
Control4-4	0			Cisplatin4-4	4			Cisplatin+JPYSF4-4	1
Control4-5	0			Cisplatin4-5	3			Cisplatin+JPYSF4-5	2
Control4-6	0			Cisplatin4-6	4			Cisplatin+JPYSF4-6	2
Control5-1	0	0.166667		Cisplatin5-1	4	3.66667		Cisplatin+JPYSF5-1	2	1.5
Control5-2	1			Cisplatin5-2	3			Cisplatin+JPYSF5-2	2
Control5-3	0			Cisplatin5-3	4			Cisplatin+JPYSF5-3	1
Control5-4	0			Cisplatin5-4	3			Cisplatin+JPYSF5-4	1
Control5-5	0			Cisplatin5-5	4			Cisplatin+JPYSF5-5	2
Control5-6	0			Cisplatin5-6	4			Cisplatin+JPYSF5-6	1
Control6-1	0	0.166667		Cisplatin6-1	3	3.33333		Cisplatin+JPYSF6-1	1	1.5
Control6-2	0			Cisplatin6-2	4			Cisplatin+JPYSF6-2	1
Control6-3	1			Cisplatin6-3	4			Cisplatin+JPYSF6-3	2
Control6-4	0			Cisplatin6-4	3			Cisplatin+JPYSF6-4	1
Control6-5	0			Cisplatin6-5	3			Cisplatin+JPYSF6-5	2
Control6-6	0			Cisplatin6-6	3			Cisplatin+JPYSF6-6	2
